# Supplementary material for: Investigation of molecular mechanisms and regulatory pathways of pro-angiogenic nanorods
Source: Royal Society of Chemistry journal article supplement (doi:10.1039/c5nr01327e), 2015-01-01
Supplement: c5nr01327e1.pdf [file c5nr01327e1.pdf]

## SUPPORTING INFORMATION

### Investigation of molecular mechanisms and regulatory pathways of pro-angiogenic nanorods

**Susheel Kumar Nethi<sup>a#</sup>, Vimal Veeriah<sup>b</sup>, Ayan Kumar Barui<sup>a#</sup>, Saranya Rajendran<sup>b</sup>,  
Saidulu Mattapally<sup>d</sup>, Sanjay Misra<sup>e</sup>, Suvro Chatterjee<sup>b,c\*</sup>, Chitta Ranjan Patra<sup>a##</sup>**

<sup>a</sup>Biomaterials Group, LST Division, CSIR-Indian Institute of Chemical Technology, Uppal Road, Tarnaka, Hyderabad - 500007, India

<sup>b</sup>Vascular Biology Lab, Life Sciences Division, AU-KBC Research Centre, Anna University, Chennai, Tamil Nadu, India,

<sup>c</sup>Department of Biotechnology, Anna University, Chennai, India

<sup>d</sup>Medicinal Chemistry and Pharmacology Division, CSIR-Indian Institute of Chemical Technology, Uppal Road, Tarnaka, Hyderabad - 500007, India

<sup>e</sup>Vascular and Interventional Radiology Translational Laboratory, Department of Radiology, Mayo Clinic, Rochester, Minnesota, USA.

<sup>#</sup>Academy of Scientific and Innovative Research (AcSIR), 2 Rafi Marg, New Delhi, India

#### **\*To whom correspondence should be addressed**

#### **Dr. Chitta Ranjan Patra, Ph.D**

<sup>a</sup>Biomaterials Group,  
CSIR-Indian Institute of Chemical Technology (CSIR-IICT)  
Uppal Road, Tarnaka, Hyderabad - 500007, India  
Tel: +91-9666204040 (Mobile), +91-40-27191480 (O)  
Fax: +91-40-27160387  
**E-mail:** [crpatra@iict.res.in](mailto:crpatra@iict.res.in); [patra.chitta@gmail.com](mailto:patra.chitta@gmail.com)

#### **Dr. Suvro Chatterjee, Ph.D**

<sup>b</sup>Vascular Biology Laboratory  
Life Sciences Division,  
AU-KBC Research Centre,  
Anna University, Chennai, Tamil Nadu, India  
Tel: + Ph: +91-44-22234885  
Fax: +91-44-2222711  
**E-mail:** [suvro@au-kbc.org](mailto:suvro@au-kbc.org)

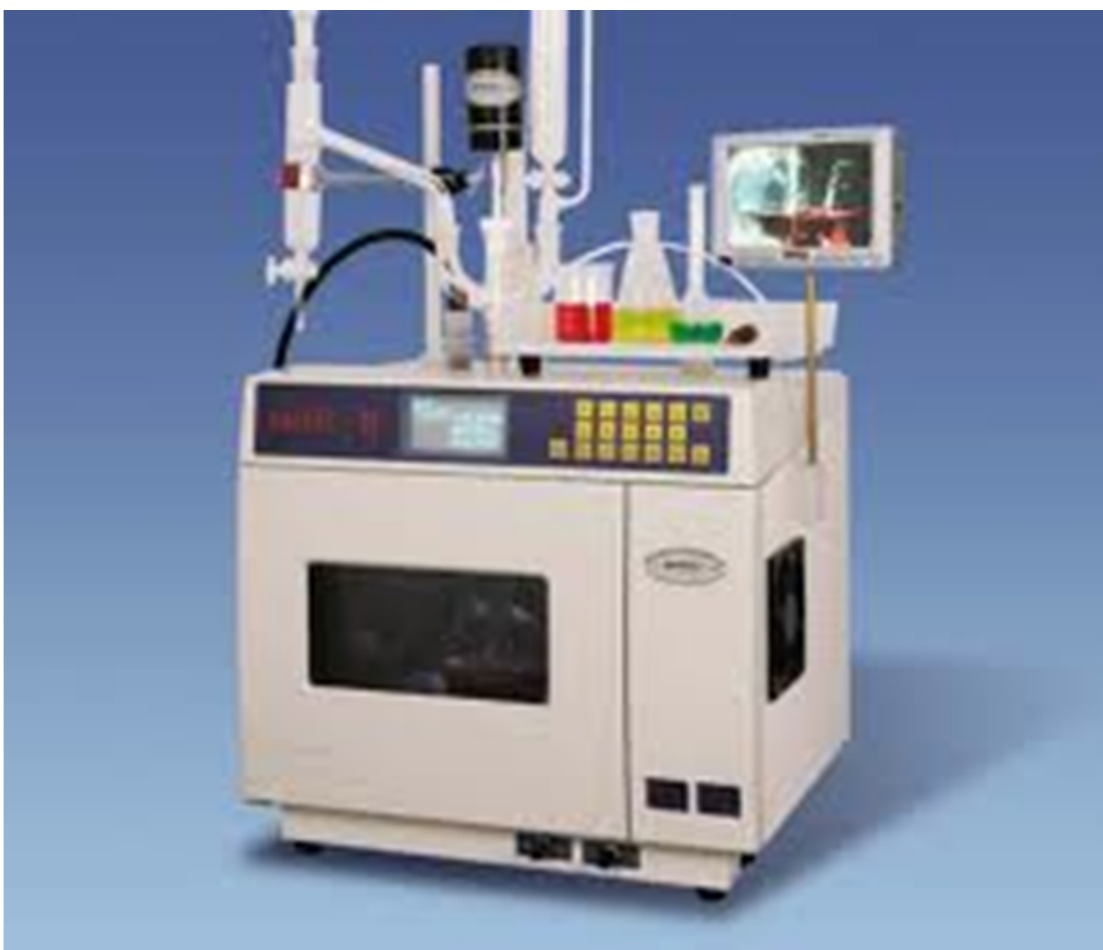

**Modified microwave oven – MAS II (*SINEO*)**

**Figure S1.** Modified microwave oven (MAS II- *SINEO*) used for the synthesis of EHNs.

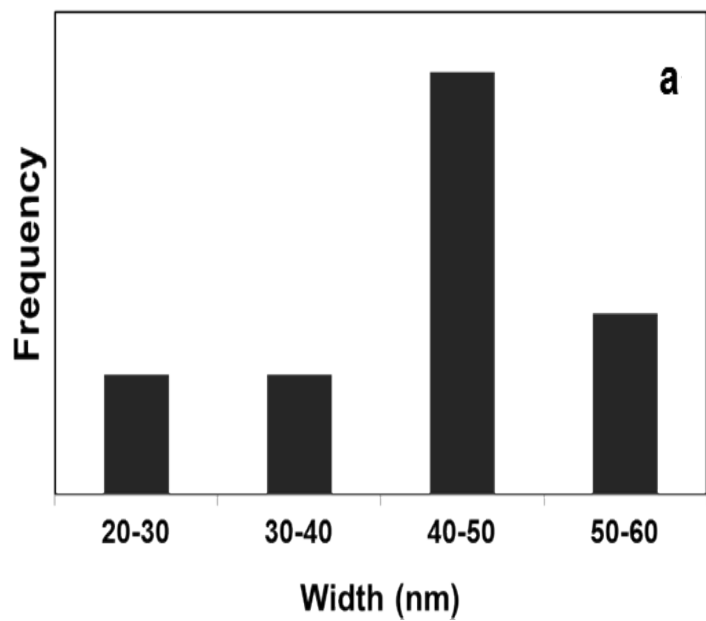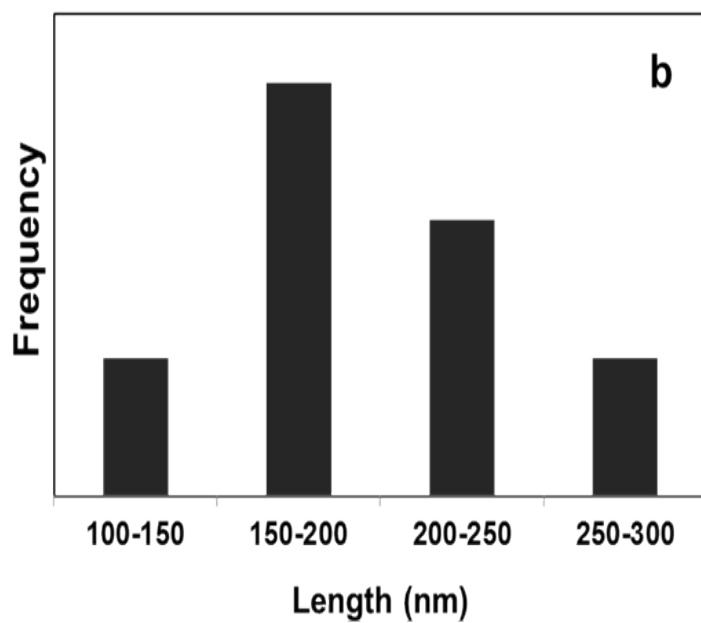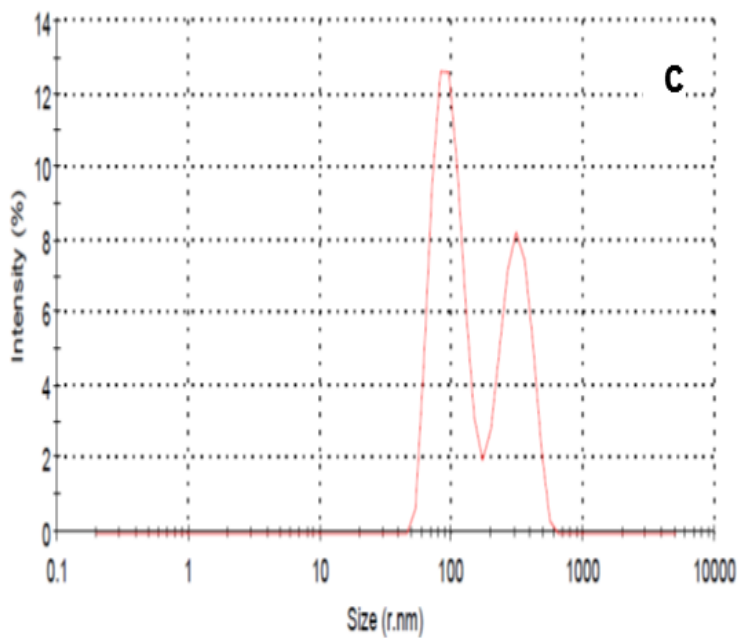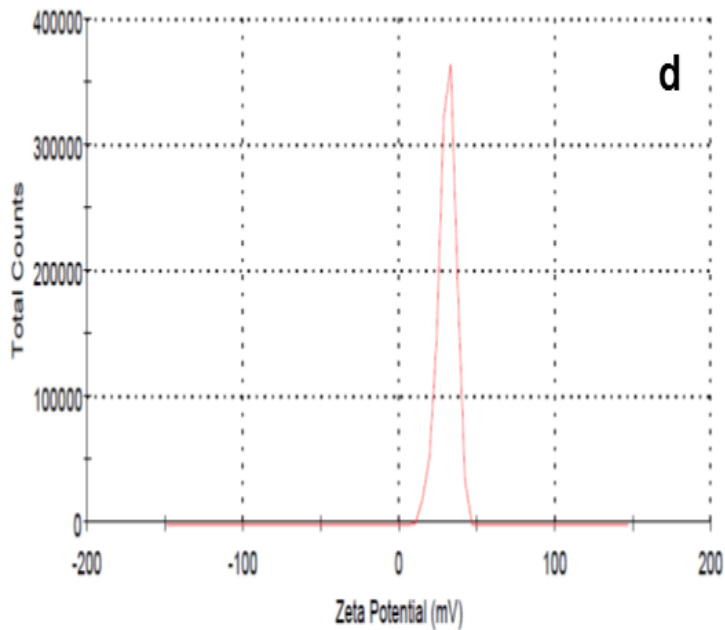

**Figure S2.** Particle size distribution of nanorods (a) length and (b) width using ImageJ software. (c) Analysis of EHNs particle size using DLS. (d) Zeta potential distribution (surface charge) of EHNs using DLS.

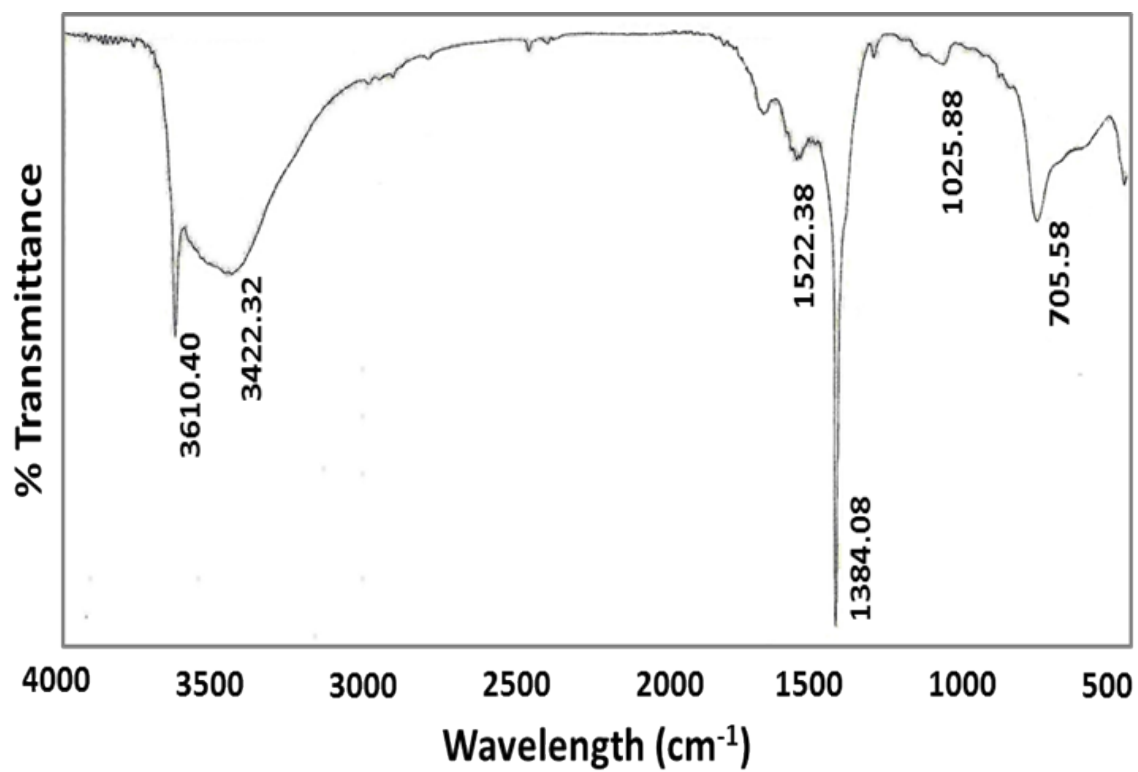

**Figure S3.** FTIR analysis of as-synthesized EHNs showing the characteristic peaks at 3610 cm<sup>-1</sup> and 705.58 cm<sup>-1</sup>.

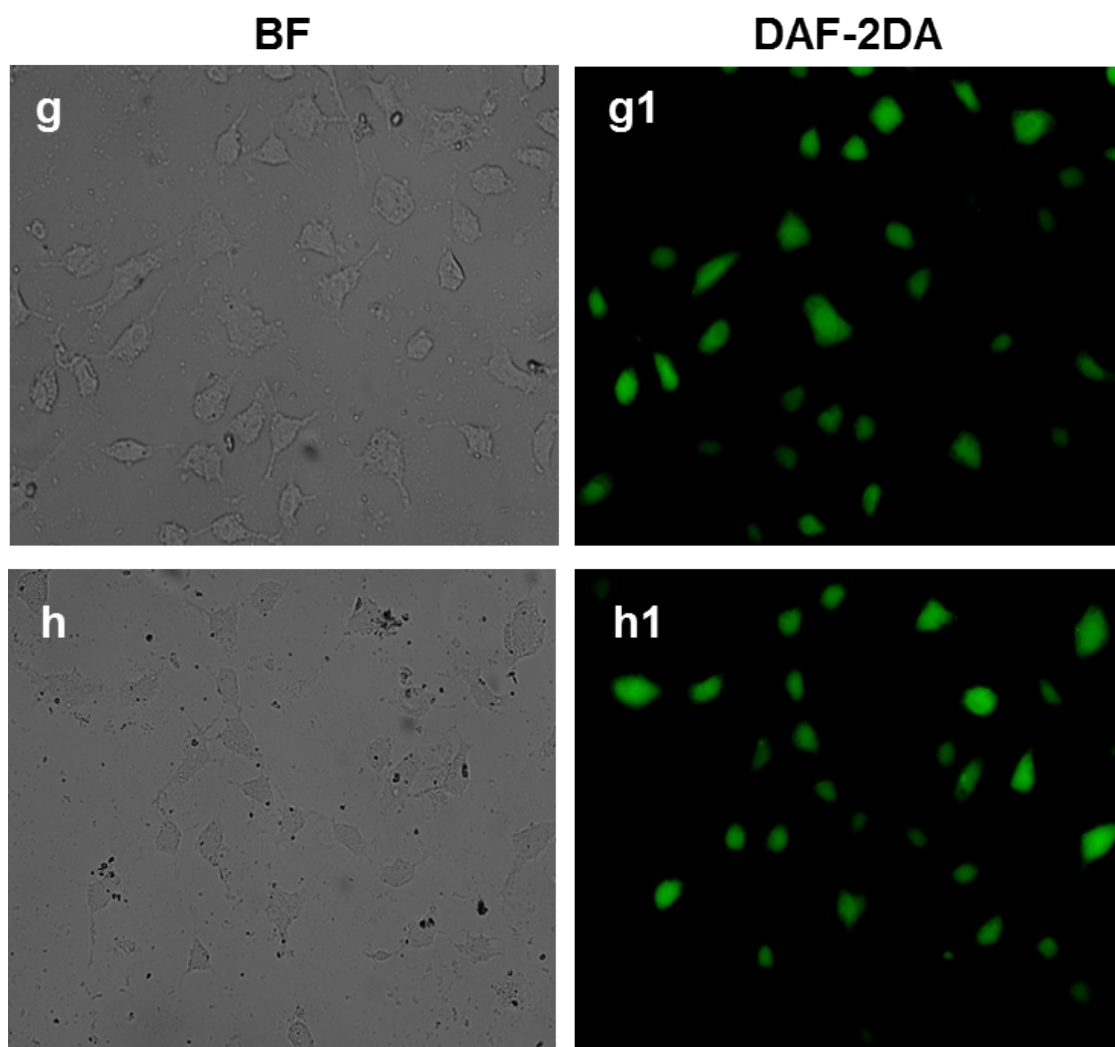

**Figure S4.** Fluorescence imaging of nitric oxide production in EA.hy 926 cells upon treatment with (g-g1) EHNs + catalase and (h-h1) EHNs + MnTBAP + catalase respectively using DAF-2DA dye.

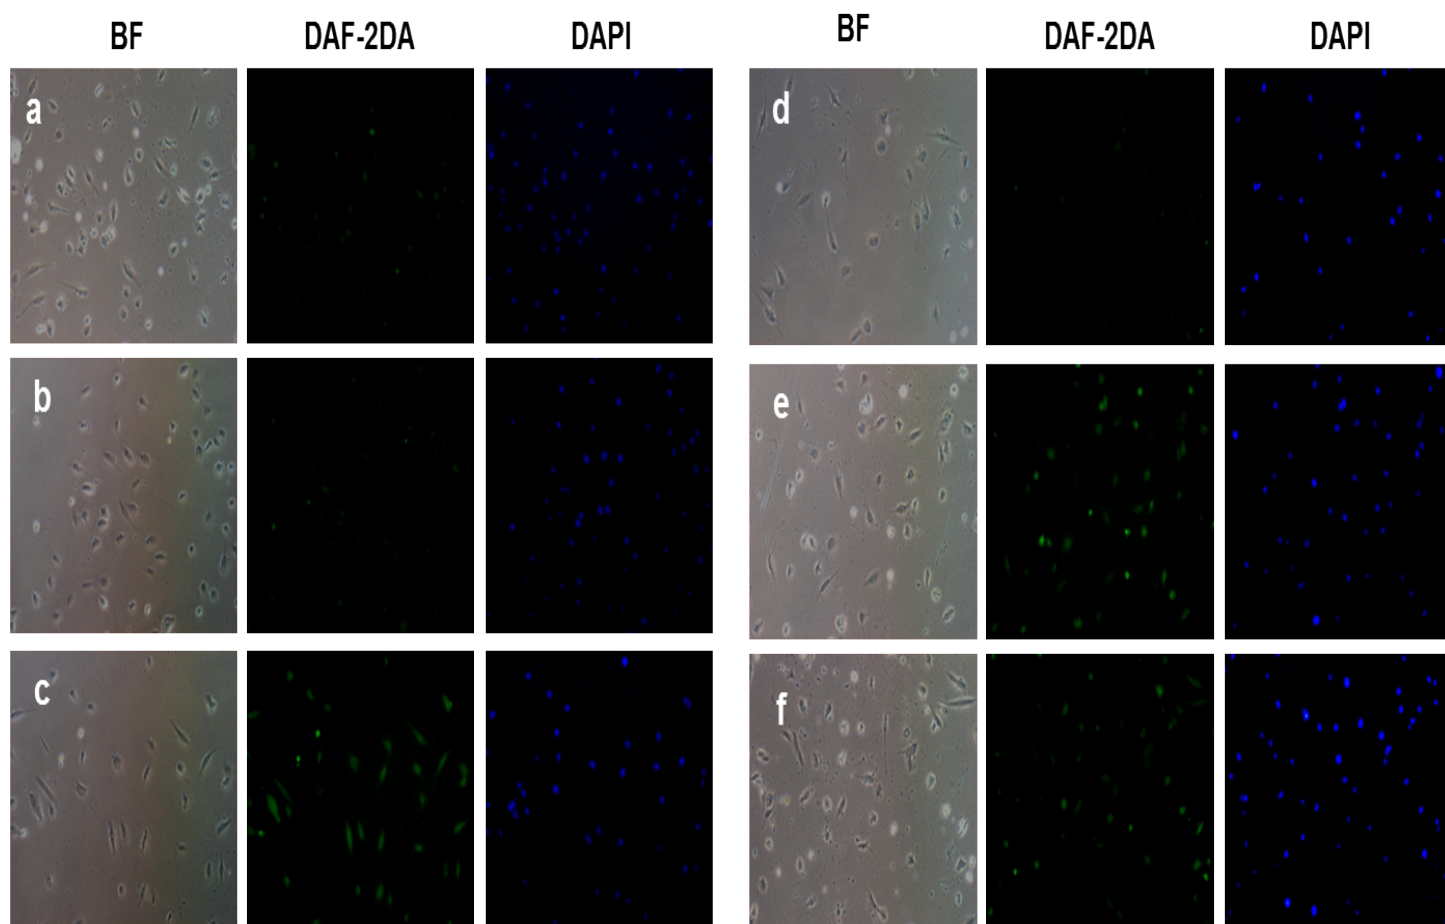

**Figure S5.** Nitric oxide imaging in HUVEC in response to (a) Control, (b) TE, (c) VEGF, (d) L-NAME, (e) EHNs (20  $\mu\text{g}/\text{mL}$ ) and (f) EHNs+ L-NAME treatments respectively using DAF-2DA.

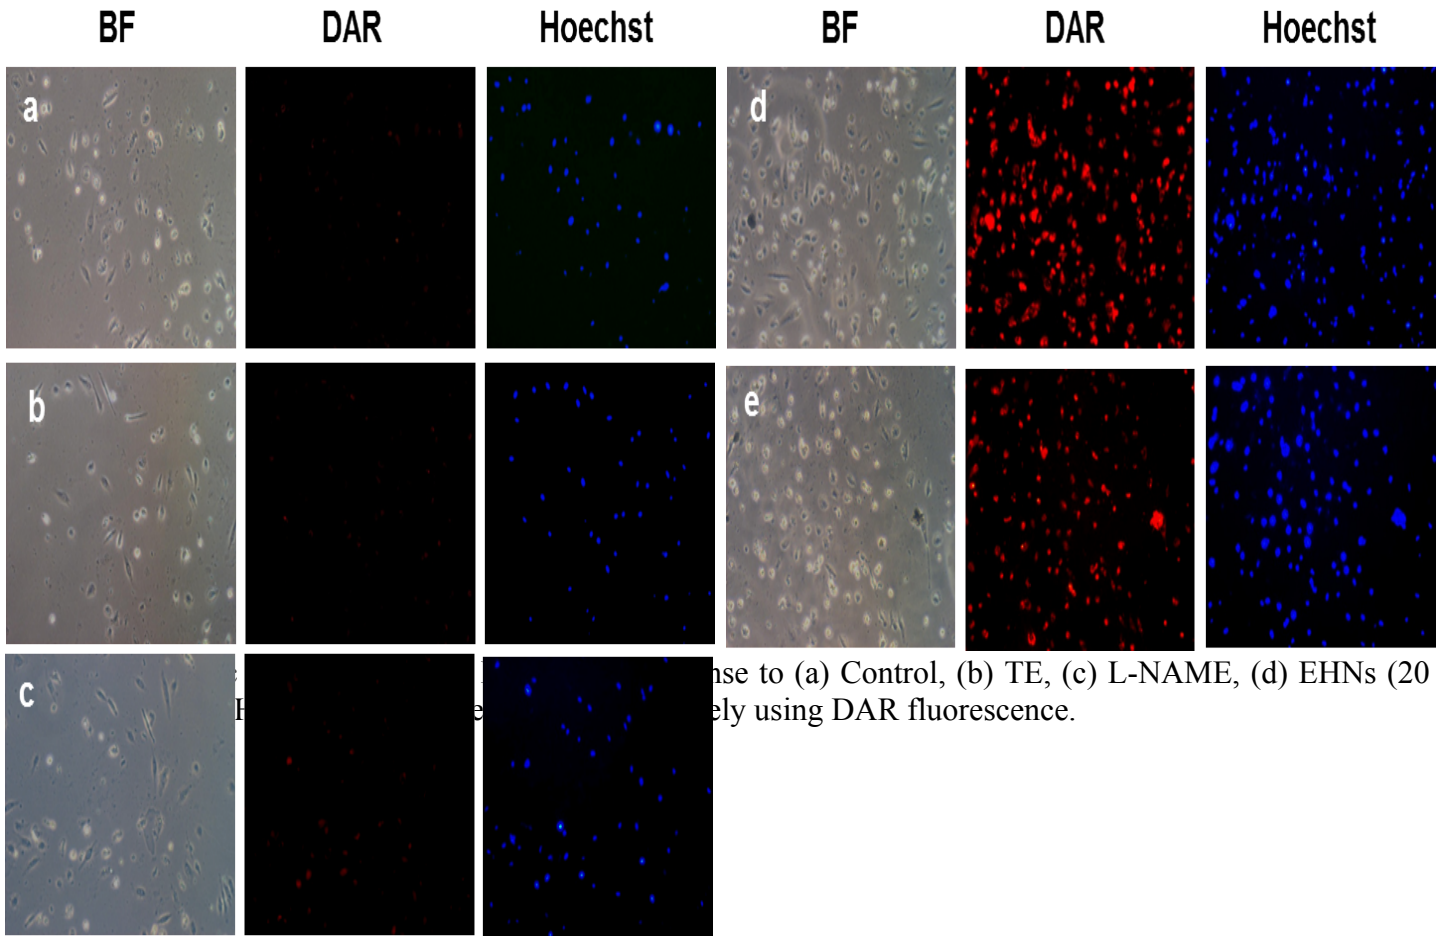

Figure 1. Response to (a) Control, (b) TE, (c) L-NAME, (d) EHNs (20 μg/ml) and (e) EHNs (20 μg/ml) + L-NAME (20 μg/ml) using DAR fluorescence.

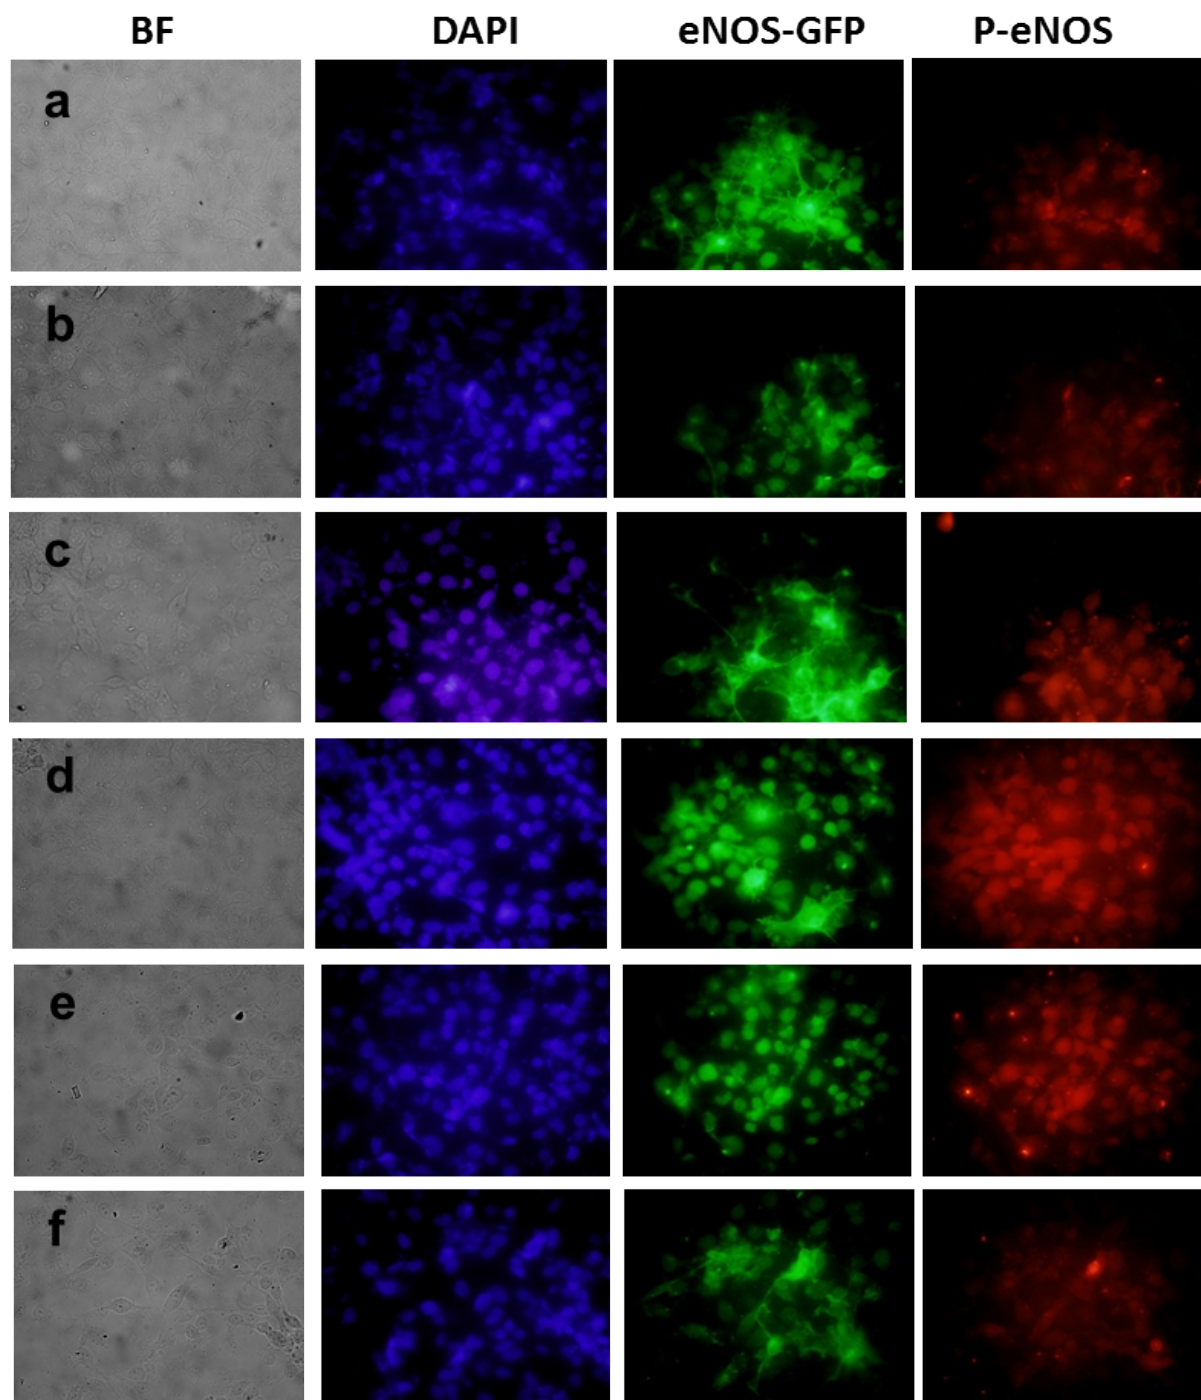

**Figure S7.** Immunofluorescence of eNOS- phosphorylation at ser-1177 residue in ECV-304 cells in response to (a) Control, (b) EHNs (5  $\mu\text{g}/\text{mL}$ ), (c) EHNs + MnTBAP, (d) VEGF, (e) EHNs + catalase and (f) EHNs + MnTBAP + catalase respectively.



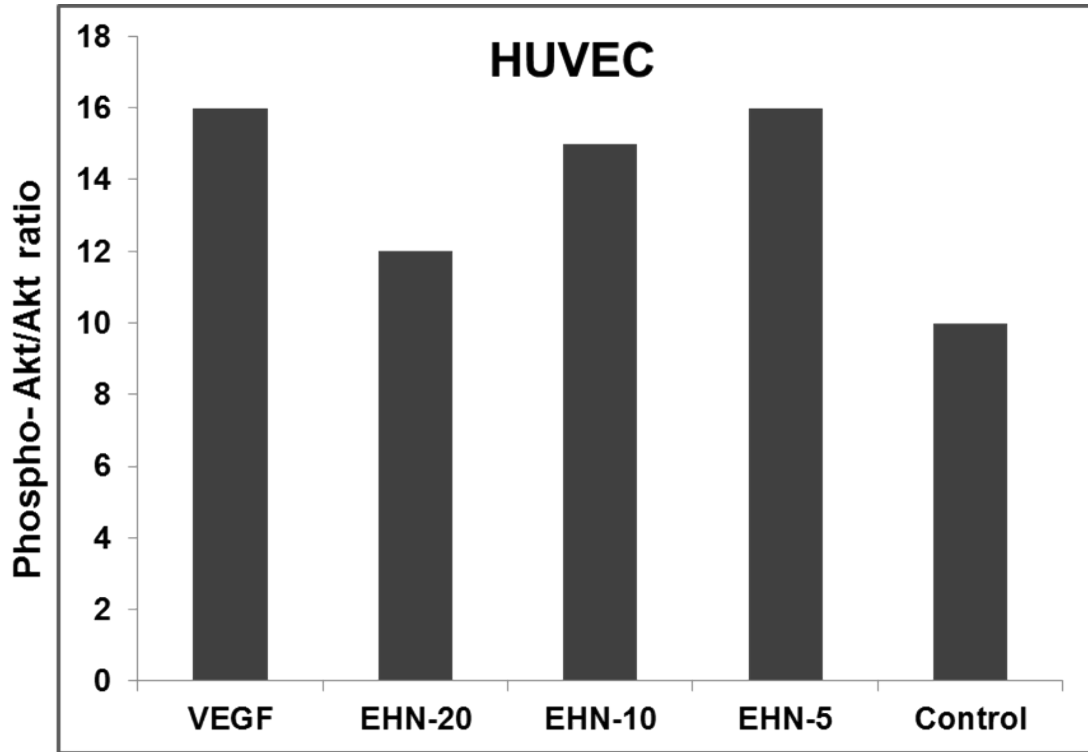

**Figure S8.** Densitometric analysis of Phospho-Akt (Tyr 450) expression in HUVECs incubated with EHNs: 5-20  $\mu\text{g}/\text{mL}$ . VEGF 40 ng is used as a positive control treatment.

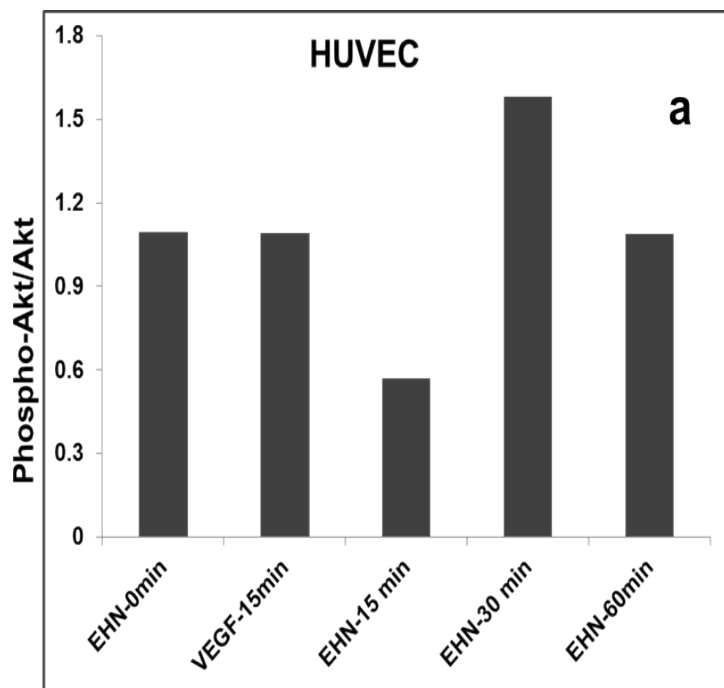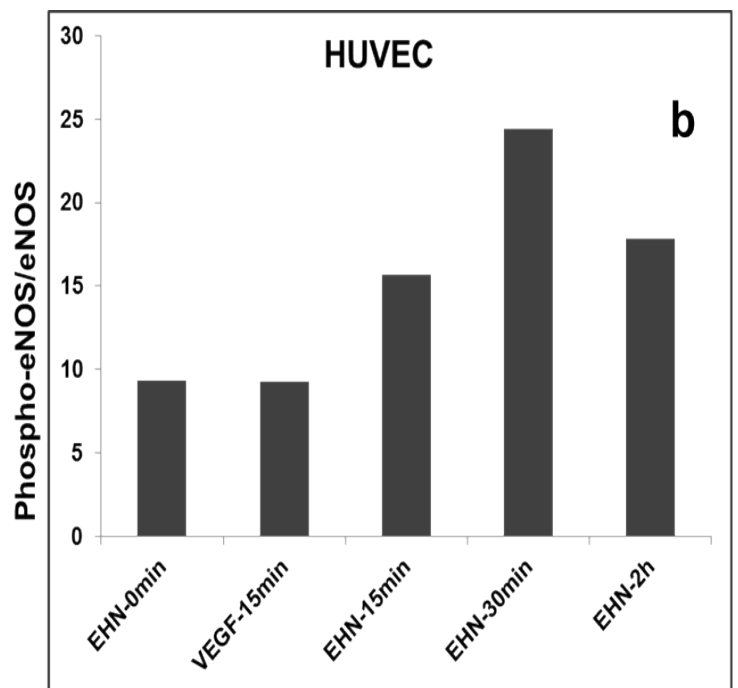

**Figure S9(a-b).** Densitometric analysis of (a) Phospho-Akt (Tyr 450) & (b) Phospho-eNOS (Ser 1177) expression in HUVECs incubated with EHNs in a time dependent manner. VEGF 40 ng is used as a positive control treatment.

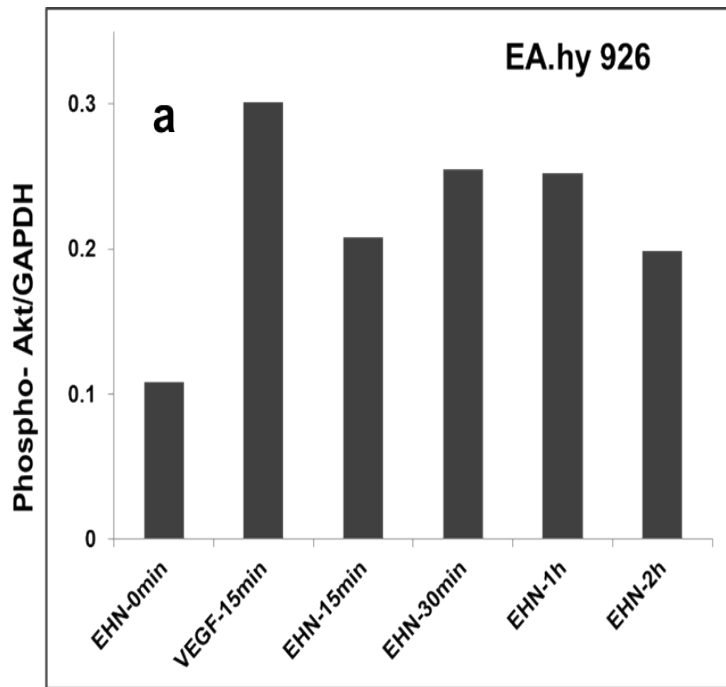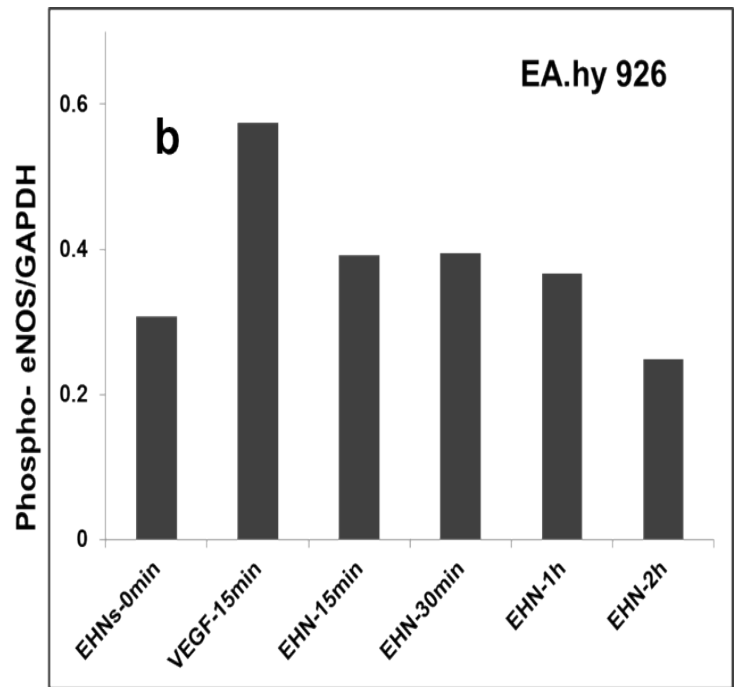

**Figure S10(a-b).** Densitometric analysis of (a) Phospho-Akt (Tyr 450) & (b) Phospho-eNOS (Ser 1177) expression in EA.hy 926 cells incubated with EHNs in a time dependent manner. VEGF 40 ng is used as a positive control treatment.

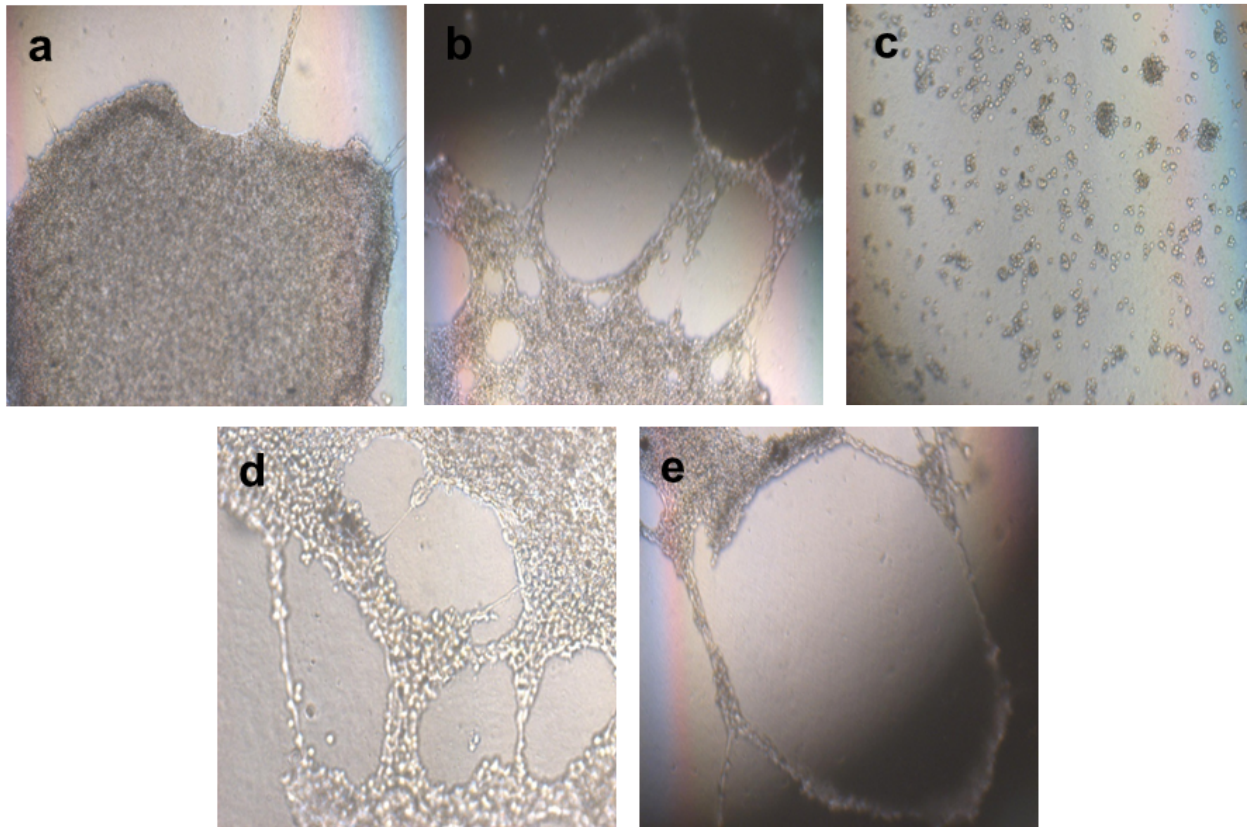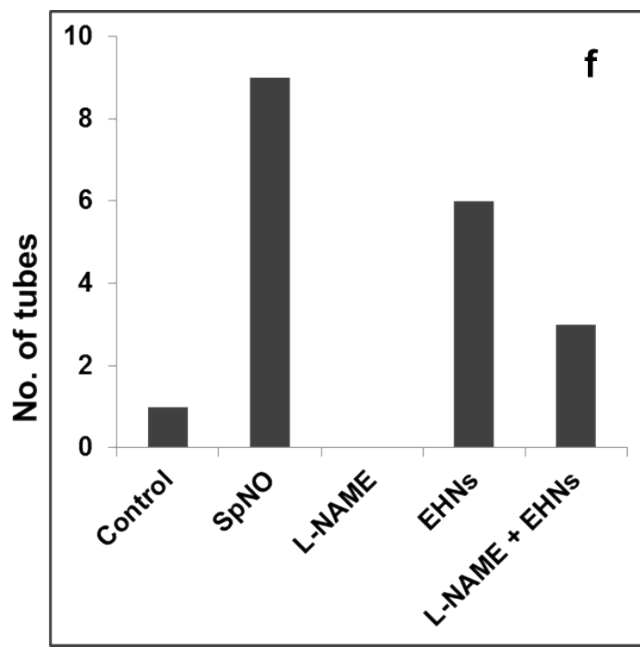

**Table. S1**

**Figure S11.** Tube formation assay performed in ECV-304 cells incubated with (a) Control, (b) Sodium nitro prusside (SNP), (c) L-NAME, (d) EHNs and (e) EHNs + L-NAME respectively. (f) Corresponding representation of number of tubes.

| Gene  | Forward primer           | Reverse primer           | Size (Kb) | Annealing Temp |
|-------|--------------------------|--------------------------|-----------|----------------|
| GAPDH | AGTAGAGGCAGGGATGATGTT    | CTTTGGTATCGTGGAAGGACTC   | 133       | 57             |
| eNOS  | ACCCTCACCGCTACAACAT      | GCTCATTCTCCAGGTGCTTC     | 198       | 58             |
| iNOS  | ACAAGCCTACCCCTCCAG       | TCCCGTCAGTTGGTAGGTTC     | 158       | 57             |
| VEGF  | ACACATTGTTGGAAGAAGCAGCCC | AGGAAGGTCAACCACTCACACACA | 179       | 60             |
| VEGFR | ACGGACAGTGGTATGGTTCT     | TGTCTGTGTCATCGGAGTGA     | 175       | 58             |

**Table S1.** Detailed sequence of the primers used for the Real Time-PCR analysis.
